# Supplementary material
Source: PubMed Central journal article supplement (PMC4034249)
Supplement: 1406501111_pnas.201406501SI.pdf [file 1406501111_pnas.201406501SI.pdf]

# Supporting Information

Stanish et al. 10.1073/pnas.1406501111

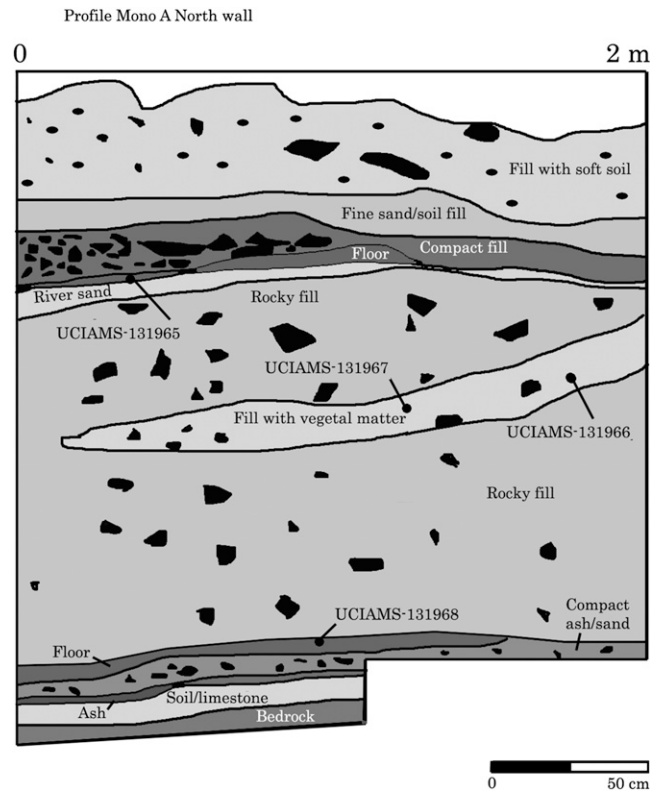

Fig. S1. Profile of cleaned and excavated profile at Mono A, showing fill layers and locations of radiocarbon samples.

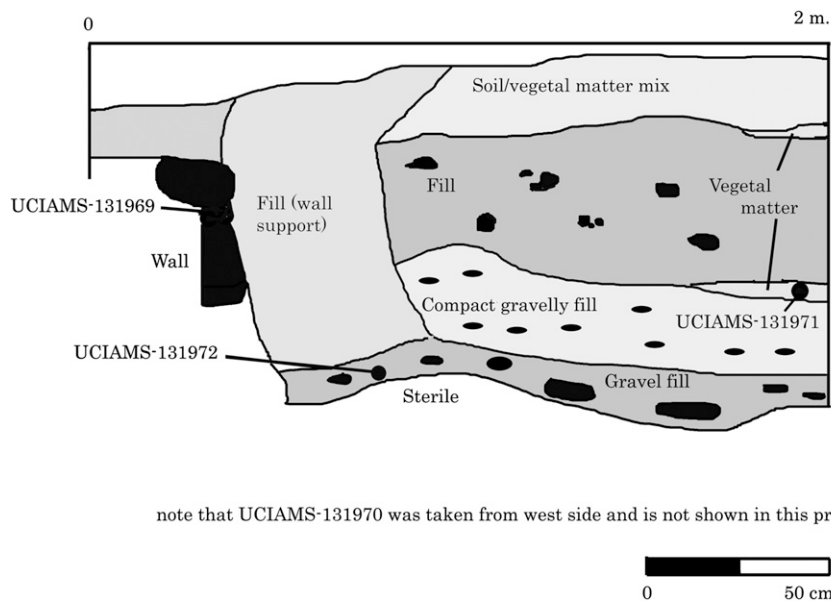

note that UCIAMS-131970 was taken from west side and is not shown in this profile.

Fig. S2. Profile of excavation unit from Mono B, showing fill layers, wall features, and location of radiocarbon samples.

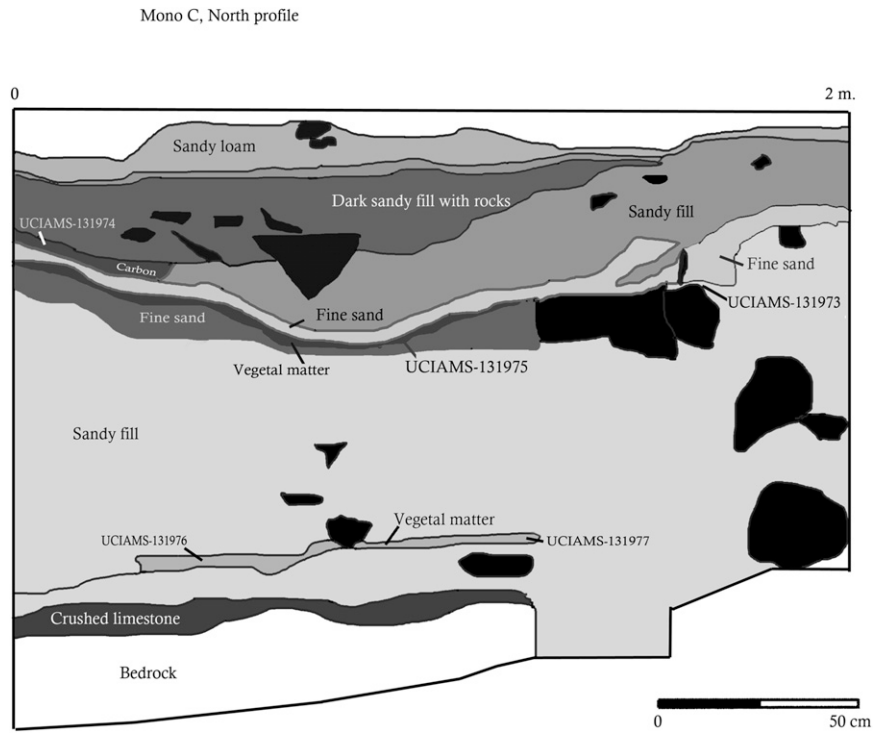

Fig. S3. Profile of excavation unit from Mono C1, showing fill layers and locations of radiocarbon samples.

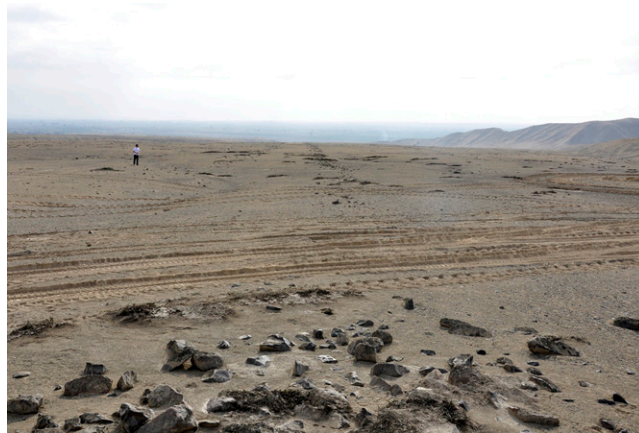

Fig. S4. Photograph showing lines 29 and 30 (center of photograph, extending into the background). Together these lines mark the June solstice.

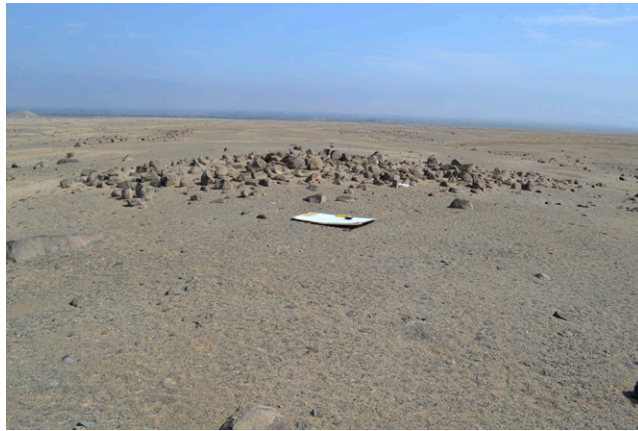

Fig. 55. Remains of circular stone platform feature between geoglyph lines 360 and 370, facing northeast. The lines extend northeast away from the platform feature.

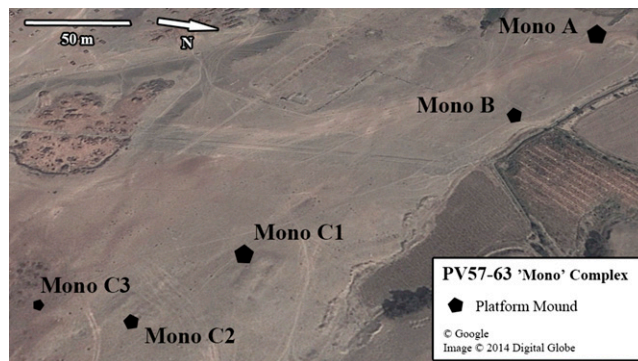

Fig. 56. Site PV57-63 ("Mono" complex) showing the location of platform mounds.

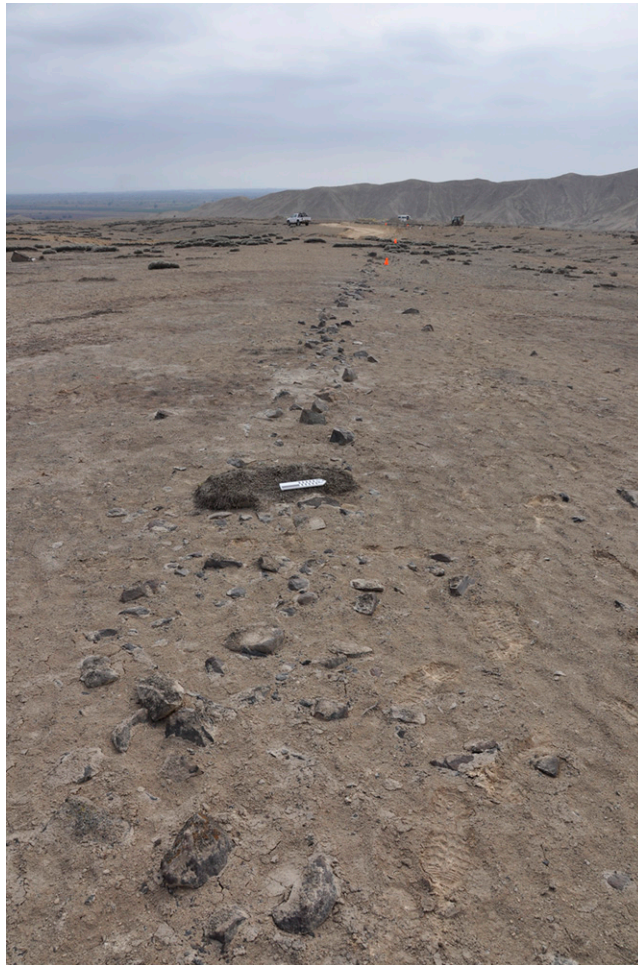

**Fig. 57.** Line 18 showing additive construction technique.
